## Edoxaban treatment of elderly patients with atrial fibrillation in routine clinical practice: 1-year results of the non-interventional Global ETNA-AF program

T. Yamashita<sup>1</sup>, C.C. Wang<sup>2</sup>, Y.-H. Kim<sup>3</sup>, R. De Caterina<sup>4</sup>, P. Kirchhof<sup>5</sup>, P. Reimitz<sup>6</sup>, C. Chen<sup>7</sup>, M. Unverdorben<sup>7</sup>, Y. Koretsune<sup>8</sup>

<sup>1</sup>Cardiovascular Institute, The Department of Cardiovascular Medicine, Tokyo, Japan; <sup>2</sup>Chang Gung University and Chang Gung Memorial Hospital, Taoyuan, Taiwan; <sup>3</sup>Korea University College of Medicine and Korea University Medical Center, Department of Internal Medicine, Seoul, Korea (Republic of); <sup>4</sup>University of Pisa, Pisa, Italy; <sup>5</sup>University of Birmingham, Institute of Cardiovascular Sciences, Birmingham, United Kingdom; <sup>6</sup>Daiichi Sankyo Europe, GmbH, Munich, Germany; <sup>7</sup>Daiichi Sankyo, Inc., Basking Ridge, United States of America; <sup>8</sup>Osaka National Hospital, Osaka, Japan

**Funding Acknowledgement:** Type of funding source: Private company. Main funding source(s): Daiichi Sankyo

**Background:** The prevalence of atrial fibrillation (AF) and the need for appropriate anticoagulation increase with age. The benefit/risk profile of direct oral anticoagulants such as edoxaban in elderly population with AF in regular clinical practice is therefore of particular interest.

**Purpose:** Analyses of Global ETNA-AF data were performed to report patient characteristics, edoxaban treatment, and 1-year clinical events by age subgroups.

**Methods:** Global ETNA-AF is a multicentre, prospective, noninterventional program conducted in Europe, Japan, Korea, Taiwan, and other Asian countries. Demographics, baseline characteristics, and 1-year clinical event data were analysed in four age subgroups.

**Results:** Of 26,823 patients included in this analysis, 50.4% were  $\geq 75$  years old and 11.6% were  $\geq 85$  years. Increase in age was generally

associated with lower body weight, lower creatinine clearance, higher CHA<sub>2</sub>DS<sub>2</sub>-VASc and HAS-BLED scores, and a higher percentage of patients receiving the reduced dose of 30 mg daily edoxaban. At 1-year, rates of ISTH major bleeding and ischaemic stroke were generally low across all age subgroups. The proportion of intracranial haemorrhage within major bleeding events was similar across age groups. All-cause mortality increased with age more than cardiovascular mortality.

**Conclusion:** Data from Global ETNA-AF support the safety and effectiveness of edoxaban in elderly AF patients (including  $\geq 85$  years) in routine clinical care with only a small increase in intracranial haemorrhage. The higher all-cause mortality with increasing age is not driven by cardiovascular causes.

|                                                      | <65 yr (N=4,133) | $\geq 65$ –<75 yr (N=9,169) | $\geq 75$ –<85 yr (N=10,411) | $\geq 85$ yr (N=3,108) |
|------------------------------------------------------|------------------|-----------------------------|------------------------------|------------------------|
| Age [years], mean (SD)                               | 57.3 (6.58)      | 70.0 (2.85)                 | 79.1 (2.80)                  | 87.9 (2.77)            |
| Weight [kg], mean (SD)                               | 80.7 (20.40)     | 73.0 (17.68)                | 68.0 (15.97)                 | 60.1 (14.78)           |
| CrCl [mL/min], mean (SD)                             | 101.8 (33.71)    | 75.3 (22.27)                | 57.8 (18.06)                 | 42.5 (14.25)           |
| CHA <sub>2</sub> DS <sub>2</sub> -VASc, mean (SD)    | 1.5 (1.08)       | 2.8 (1.13)                  | 4.0 (1.22)                   | 4.3 (1.30)             |
| HAS-BLED – modified, mean (SD)                       | 1.4 (0.95)       | 2.5 (1.05)                  | 2.7 (1.03)                   | 2.7 (1.04)             |
| History of congestive heart failure, %               | 12.3             | 11.1                        | 15.3                         | 24.1                   |
| Edoxaban 60 mg/30mg daily dose, %                    | 77.6 / 22.4      | 63.9 / 36.1                 | 44.9 / 55.1                  | 19.3 / 80.7            |
| Clinical event rates at 1-year follow up, n (%/year) |                  |                             |                              |                        |
| Major bleeding (ISTH)                                | 22 (0.58)        | 70 (0.83)                   | 127 (1.33)                   | 54 (2.01)              |
| Intracranial haemorrhage                             | 6 (0.16)         | 24 (0.28)                   | 33 (0.34)                    | 12 (0.45)              |
| Major GI bleeding                                    | 10 (0.26)        | 29 (0.34)                   | 66 (0.69)                    | 35 (1.30)              |
| Ischemic stroke                                      | 22 (0.58)        | 63 (0.74)                   | 89 (0.93)                    | 40 (1.49)              |
| All-cause mortality                                  | 36 (0.95)        | 156 (1.84)                  | 314 (3.28)                   | 238 (8.83)             |
| Cardiovascular mortality                             | 18 (0.47)        | 68 (0.80)                   | 124 (1.29)                   | 89 (3.30)              |
